# Supplementary material
Source: publisher site journal article supplement (https://www.spandidos-publications.com/7427/downloadSupplementary)
Supplement: Supplementary file 1 [file downloadSupplementary]

Table SI. Primer sequences used for RT-qPCR and genotyping.

| A, Primers used for RT-qPCR               |                             |                                                             |
|-------------------------------------------|-----------------------------|-------------------------------------------------------------|
| Primer                                    | Forward (5'-3')             | Reverse (5'-3')                                             |
| <i>LCMRI</i><br>( <i>Homo sapiens</i> )   | TGGTCCCATGATAACAG<br>CAGCCT | CGGCTCTGTTTGTGCTTGT<br>GCTTA                                |
| <i>LCMRI</i><br>( <i>Mus musculus</i> )   | CGATCCCTCATTGAGAAG<br>CCT   | TATGCATCAGACGACACTG<br>CTC                                  |
| $\beta$ -actin<br>( <i>Homo sapiens</i> ) | CATGTACGTTGCTATCCAG<br>GC   | CTCCTTAATGTCACGCACG<br>AT                                   |
| $\beta$ -actin<br>( <i>Mus musculus</i> ) | CCTGGGCATGGAGTCCTG<br>TG    | TCTTCATTGTGCTGGGTGC<br>C                                    |
| B, Primer used for genotyping             |                             |                                                             |
| Primer                                    | Forward (5'-3')             | Reverse (5'-3')                                             |
| <i>Sftpc</i> <sup>CreERT2</sup>           | TGCTTCACAGGGTCGGTA<br>G     | 1:<br>ACACCGGCCTTATTCCAAG<br>2:<br>CATTACCTGGGGTAGGACC<br>A |

*LCMRI*, lung cancer metastasis-related protein 1; RT-qPCR, reverse transcription-quantitative PCR.

Table SII. Thermocycling conditions for PCR amplification.

| Procedure            | Temperature | Time   |
|----------------------|-------------|--------|
| Initial denaturation | 94 °C       | 3 min  |
| Denaturation         | 94 °C       | 1 sec  |
| Anneal               | 58 °C       | 30 sec |
| Extension            | 72 °C       | 1 min  |
| Final extension      | 72 °C       | 5 min  |

Table SIII. Lentiviral vector target sequences.

| Vector                            | Target sequence (5'-3')   | Loop   | Information        |
|-----------------------------------|---------------------------|--------|--------------------|
| Lenti-GFP-Puro-sh <i>LCMR1</i> -d | CAGTGTCGTCTGA<br>TGCATATT | CTCGAG | Human <i>LCMR1</i> |
| Lenti-GFP-Puro-sh.Ctl             | CCTAAGGTTAAGT<br>CGCCCTCG | CTCGAG | Negative control   |

*LCMR1*, lung cancer metastasis-related protein 1; sh, short hairpin.

Table SIV. Lentiviral vector for *LCMRI* overexpression

|                             |                     |
|-----------------------------|---------------------|
| Gene name                   | <i>LCMRI</i>        |
| Species                     | <i>Homo sapiens</i> |
| ORF size                    | 735 bp              |
| Accession number            | NM_001317078        |
| Lentiviral plasmid backbone | pCDH-MCS-EF1a-Puro  |

Table SV. Thermocycling conditions for RT-qPCR.

| Procedure            | Temperature | Time   |
|----------------------|-------------|--------|
| Initial denaturation | 95 °C       | 3 min  |
| Denaturation         | 95 °C       | 3 sec  |
| Annealing/extension  | 60 °C       | 30 sec |
